# Supplementary material
Source: PubMed Central journal article supplement (PMC4926970)

Supplementary Material for manuscript # JASN-2015-04-0369

**Supplementary Table I. Patients status at renal replacement therapy initiation.**

Patients experiencing a more than 50% reduction in renal function during the study were censored for the primary endpoint; follow-up continued until dialysis onset

|                                                                                                                                                                                                                                                                                                                                                                               | All (N=41)                 | KD (n=11)                  | LPD (n=30)                 | p*              |
|-------------------------------------------------------------------------------------------------------------------------------------------------------------------------------------------------------------------------------------------------------------------------------------------------------------------------------------------------------------------------------|----------------------------|----------------------------|----------------------------|-----------------|
| Reason for dialysis initiation (%)                                                                                                                                                                                                                                                                                                                                            |                            |                            |                            | 0.71            |
| Severe overhydration                                                                                                                                                                                                                                                                                                                                                          | 20                         | 28                         | 17                         |                 |
| Hyperkalemia                                                                                                                                                                                                                                                                                                                                                                  | 5                          | 9                          | 3                          |                 |
| Poor appetite, low energy intake, risk for malnutrition                                                                                                                                                                                                                                                                                                                       | 51                         | 45                         | 53                         |                 |
| Poor appetite, severe acidosis                                                                                                                                                                                                                                                                                                                                                | 24                         | 18                         | 27                         |                 |
| eGFR (mL/min)                                                                                                                                                                                                                                                                                                                                                                 | <b>6.5 (6.2-7.1)</b>       | <b>6.2 (4.8-7.3)</b>       | <b>6.7 (6.3-7.2)</b>       | <b>0.02</b>     |
| Proteinuria (g/day)                                                                                                                                                                                                                                                                                                                                                           | 0.38 (0.31-0.48)           | 0.32 (0.15-0.64)           | 0.38 (0.31-0.54)           | 0.52            |
| BMI (Kg/m <sup>2</sup> )                                                                                                                                                                                                                                                                                                                                                      | 23.1 (22.4-23.8)           | 23.7 (22.2-25.2)           | 22.9 (22.1-23.7)           | 0.31            |
| SGA A (%)                                                                                                                                                                                                                                                                                                                                                                     | 71                         | 64                         | 73                         | 0.54            |
| Mean arterial blood pressure (mmHg)                                                                                                                                                                                                                                                                                                                                           | 95.3 (91.4-99.2)           | 92.8 (85.3-100.3)          | 96.2 (91.4-101.1)          | 0.44            |
| Serum urea (mg/dL)                                                                                                                                                                                                                                                                                                                                                            | <b>264.7 (247.1-282.2)</b> | <b>212.4 (179.7-245.1)</b> | <b>283.8 (267.1-300.6)</b> | <b>&lt;0.01</b> |
| Serum uric acid (mg/dL)                                                                                                                                                                                                                                                                                                                                                       | <b>6.1 (5.9-6.4)</b>       | <b>5.7 (5.4-6.1)</b>       | <b>6.3 (6.0-6.6)</b>       | <b>0.04</b>     |
| Serum bicarbonate (mEq/L)                                                                                                                                                                                                                                                                                                                                                     | 14.1 (13.4-14.8)           | 15.1 (13.5-16.8)           | 13.8 (12.9-14.6)           | 0.1             |
| Serum calcium (mg/dL)                                                                                                                                                                                                                                                                                                                                                         | <b>3.5 (3.3-3.9)</b>       | <b>4.2 (4.2-4.8)</b>       | <b>3.3 (3.2-3.5)</b>       | <b>&lt;0.01</b> |
| Serum phosphates (mg/dL)                                                                                                                                                                                                                                                                                                                                                      | <b>7.6 (7.0-8.2)</b>       | <b>5.5 (4.8-6.1)</b>       | <b>8.3 (7.8-8.9)</b>       | <b>&lt;0.01</b> |
| C-reactive Protein (mg/L)                                                                                                                                                                                                                                                                                                                                                     | <b>8.1 (7.1-9.2)</b>       | <b>10 (8.2-11.8)</b>       | <b>7.5 (6.2-8.8)</b>       | <b>0.03</b>     |
| Serum albumin (g/dL)                                                                                                                                                                                                                                                                                                                                                          | 4.0 (4.0-4.1)              | 3.9 (3.9-4.0)              | 4.1 (4.0-4.2)              | 0.17            |
| Serum potassium (mEq/L)                                                                                                                                                                                                                                                                                                                                                       | 5.2 (5.1-5.4)              | 5.0 (4.7-5.4)              | 5.3 (5.1-5.5)              | 0.17            |
| Data showed as mean or median and 95% Confidence Interval.                                                                                                                                                                                                                                                                                                                    |                            |                            |                            |                 |
| KD - Keto-diet; LPD - low protein diet; eGFR - estimated glomerular filtration rate.                                                                                                                                                                                                                                                                                          |                            |                            |                            |                 |
| *KD vs. LPD.                                                                                                                                                                                                                                                                                                                                                                  |                            |                            |                            |                 |
| To convert eGFR in mL/min to mL/s, multiply by 0.01667 – serum urea in mg/dL to mmol/L, multiply by 0.357 – BUN in mg/dL, multiply serum urea by 0.467 – serum bicarbonate in mEq/L to mmol/L, multiply by 1 – serum calcium in mg/dL to mmol/L, multiply by 0.2495 – serum phosphates in mg/dL to mmol/L, multiply by 0.3229 – serum albumin in g/dL to g/L, multiply by 10. |                            |                            |                            |                 |

**Supplementary Table II.** Reported content of the Ketoacid supplement used in the study (Ketosteril® - Fresenius Kabi, Bad Homburg, Germany)

| Component No. | Component Name                                                  | mg/pill |
|---------------|-----------------------------------------------------------------|---------|
| 1             | Ca (RS)-3methyl-2-oxovaleric acid (ketoisoleucine)              | 67      |
| 2             | Ca 4-methyl-2-oxovaleric acid (ketoleucine)                     | 101     |
| 3             | Ca 2-oxo-3-phenylpropionic acid (ketophenylalanine)             | 68      |
| 4             | Ca 3-methyl-2-oxobutyric acid (ketovaline)                      | 86      |
| 5             | Ca (RS)-2-hydroxy-4-methylthio-butyric acid (hydroxymethionine) | 59      |
| 6             | L-Lysine acetate                                                | 105     |
| 7             | L-Threonine                                                     | 53      |
| 8             | L-Tryptophan                                                    | 23      |
| 9             | L-Histidine                                                     | 38      |
| 10            | L-Tyrosine                                                      | 30      |
| 11            | Ca                                                              | 50      |

Ca, calcium; RS, racemic mixture of both R and S stereoisomers.

**Supplementary Figure 1. Proteinuria (g/day) during the study.** There was no statistical significant difference between the two groups

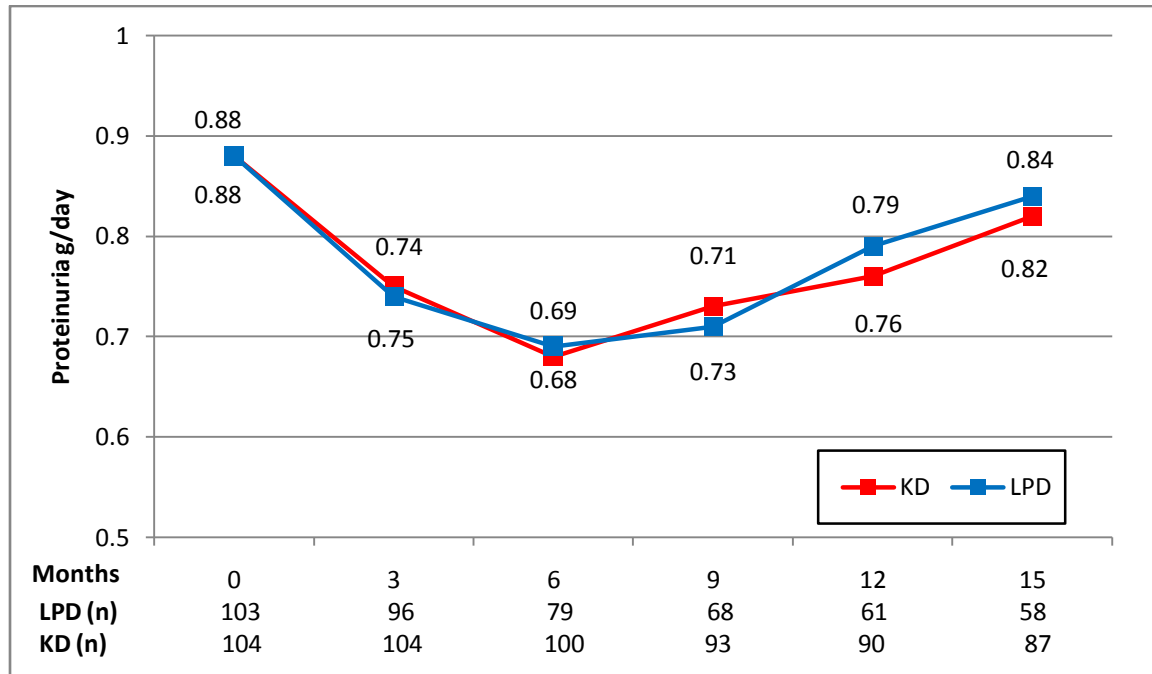

**Supplementary Figure 2. Mean arterial pressure (mmHg) during the study.** There was no statistical significant difference between the two groups

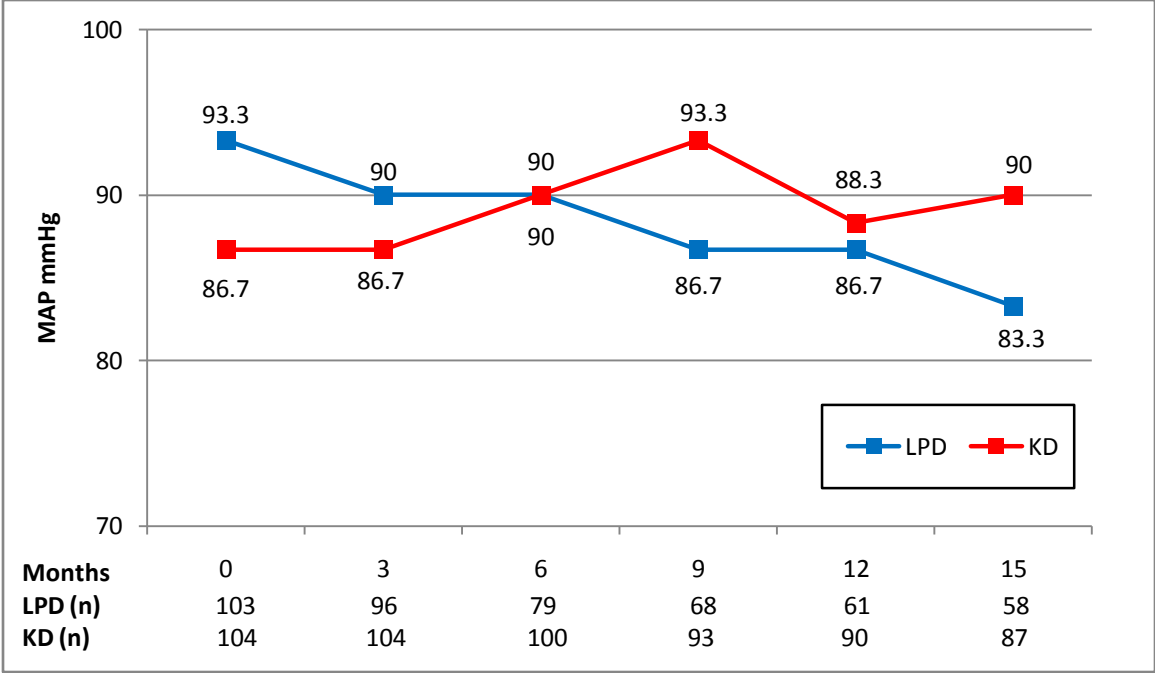

**Supplementary Figure 3. Serum urea (mg/dL) during the study.** “Δ” implies statistical significant difference between the two groups

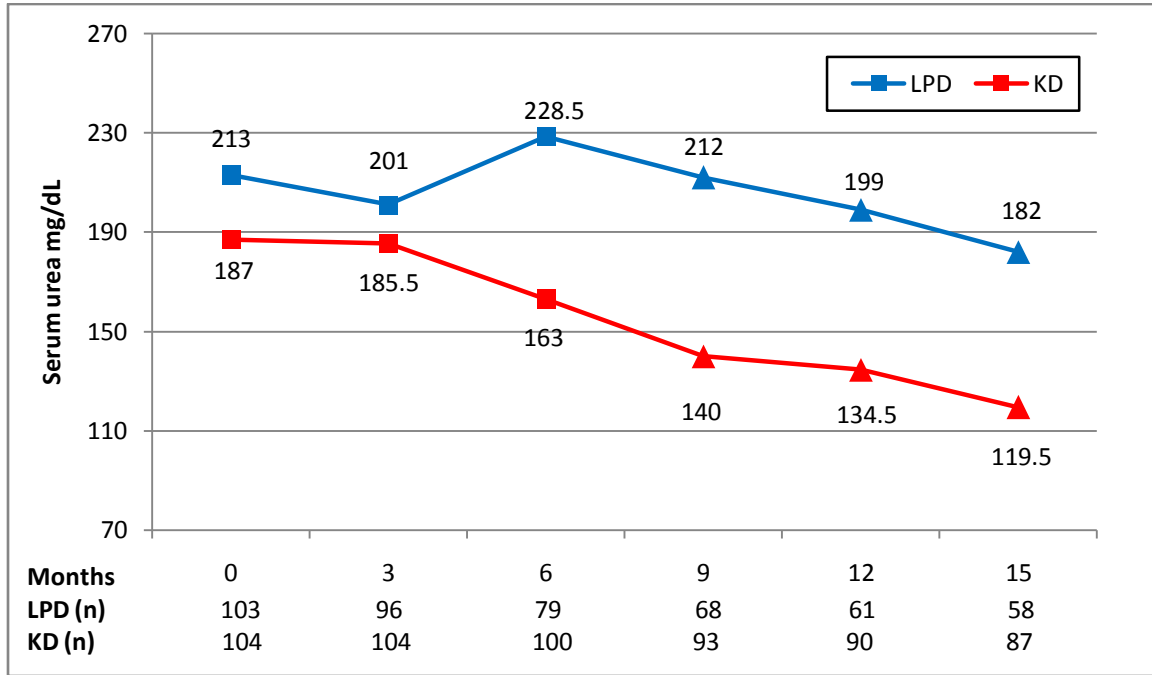

**Supplementary Figure 4. Serum uric acid (mg/dL) during the study. “Δ” implies statistical significant difference between the two groups**

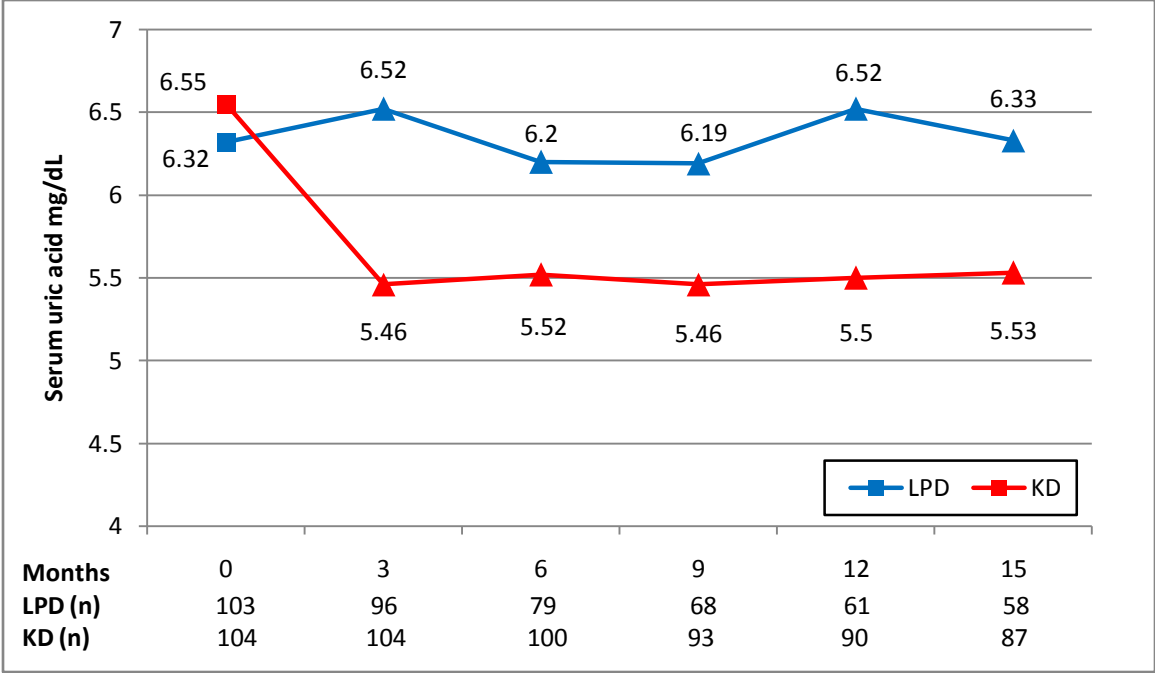

**Supplementary Figure 5. C-reactive protein (mg/L) during the study.** “Δ” implies statistical significant difference between the two groups

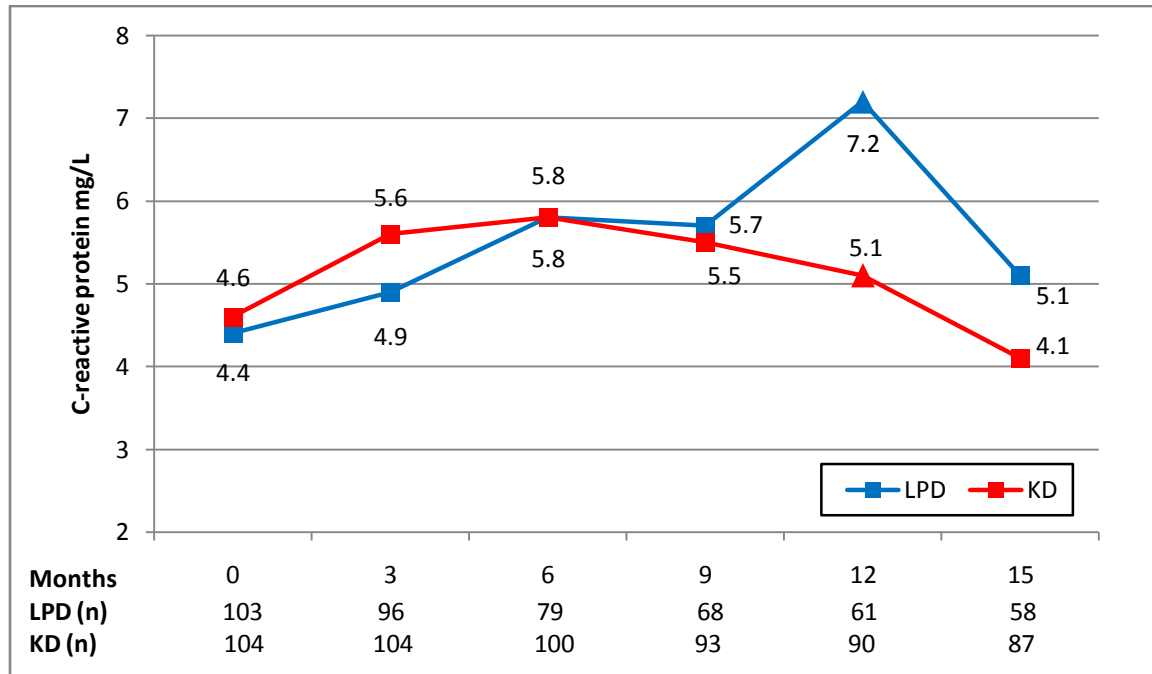

**Supplementary Figure 6. Serum albumin (g/dL) during the study.** There was no statistical significant difference between the two groups

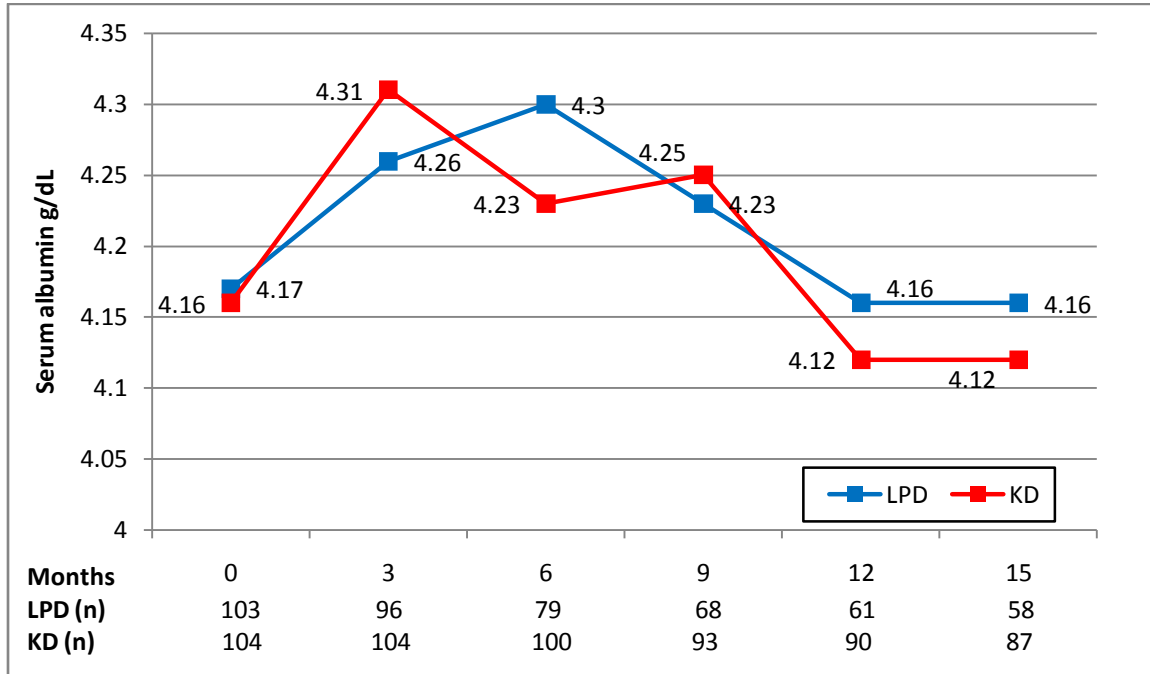



**Supplementary Figure 7. Serum potassium (mEq/L) during the study.** “Δ” implies statistical significant difference between the two groups

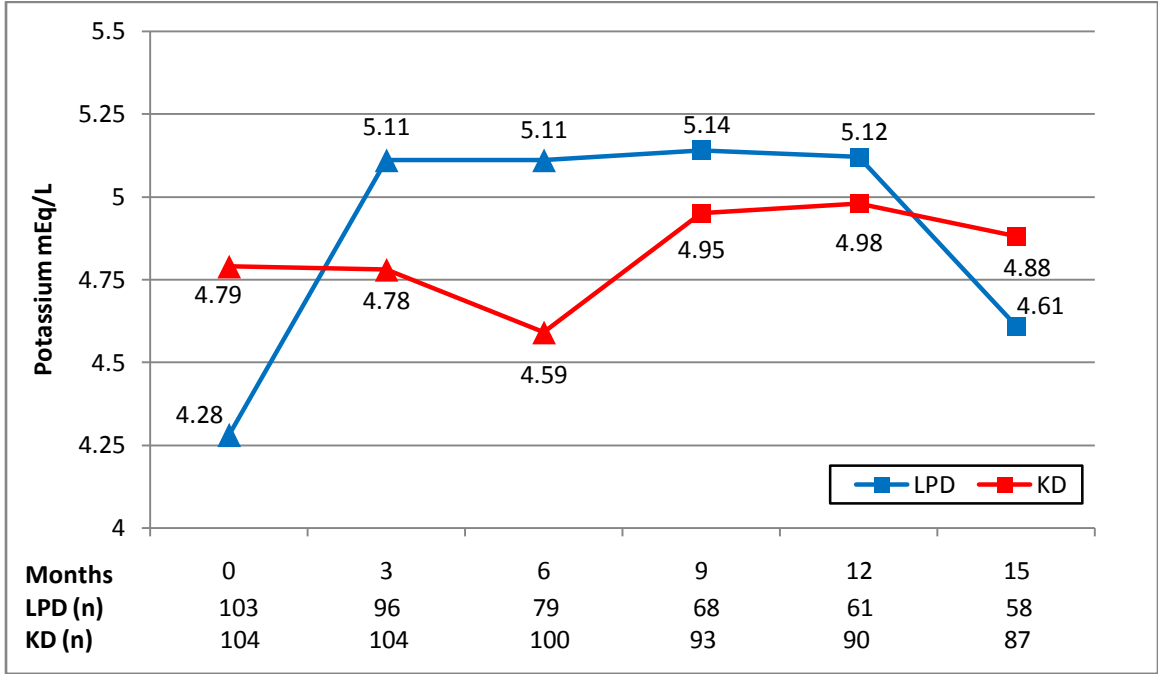

Supplement: ASN.2015040369_ASN2015040369SupplementaryData.pdf [file ASN.2015040369_ASN2015040369SupplementaryData.pdf]
